# Supplementary material for: Isolation, Characterization, Complete Structural Assignment, and Anticancer Activities of the Methoxylated Flavonoids from Rhamnus disperma Roots
Source: MDPI journal article supplement (doi:10.3390/molecules26195827), 2021-09-26
Supplement: s1 [file s1]

# Supplementary material

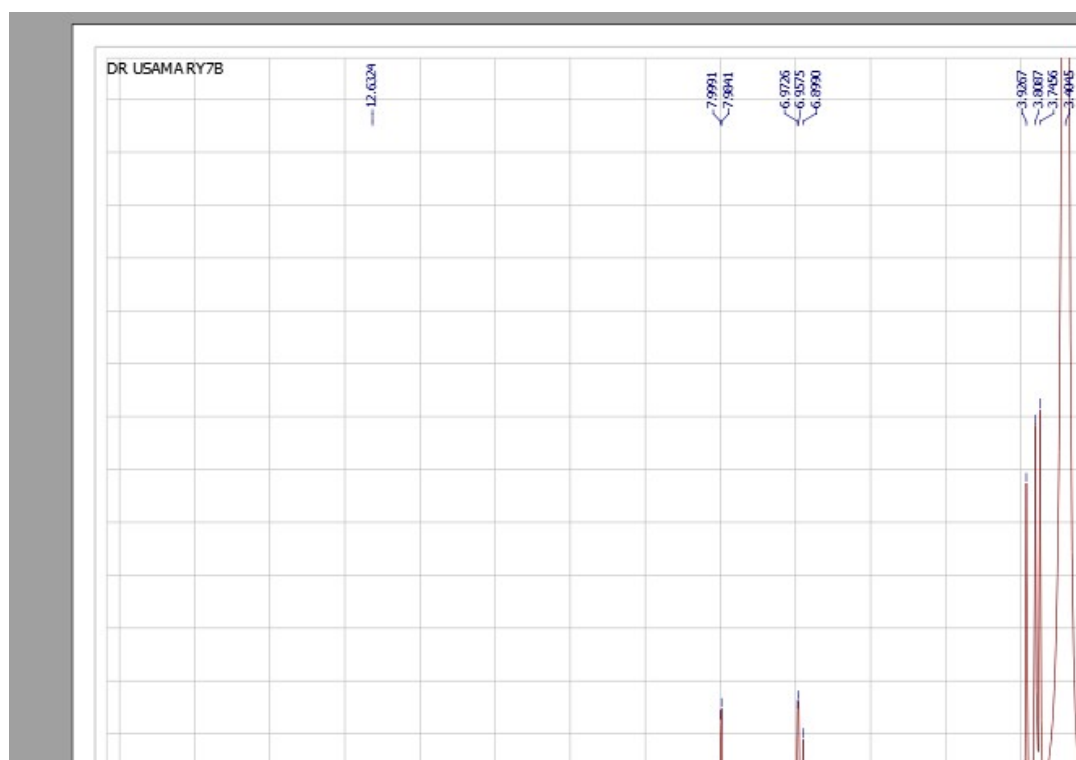

Figure S1:  $^1\text{H}$  NMR spectrum of compound 1 (DMSO- $d_6$ , 500 MHz)

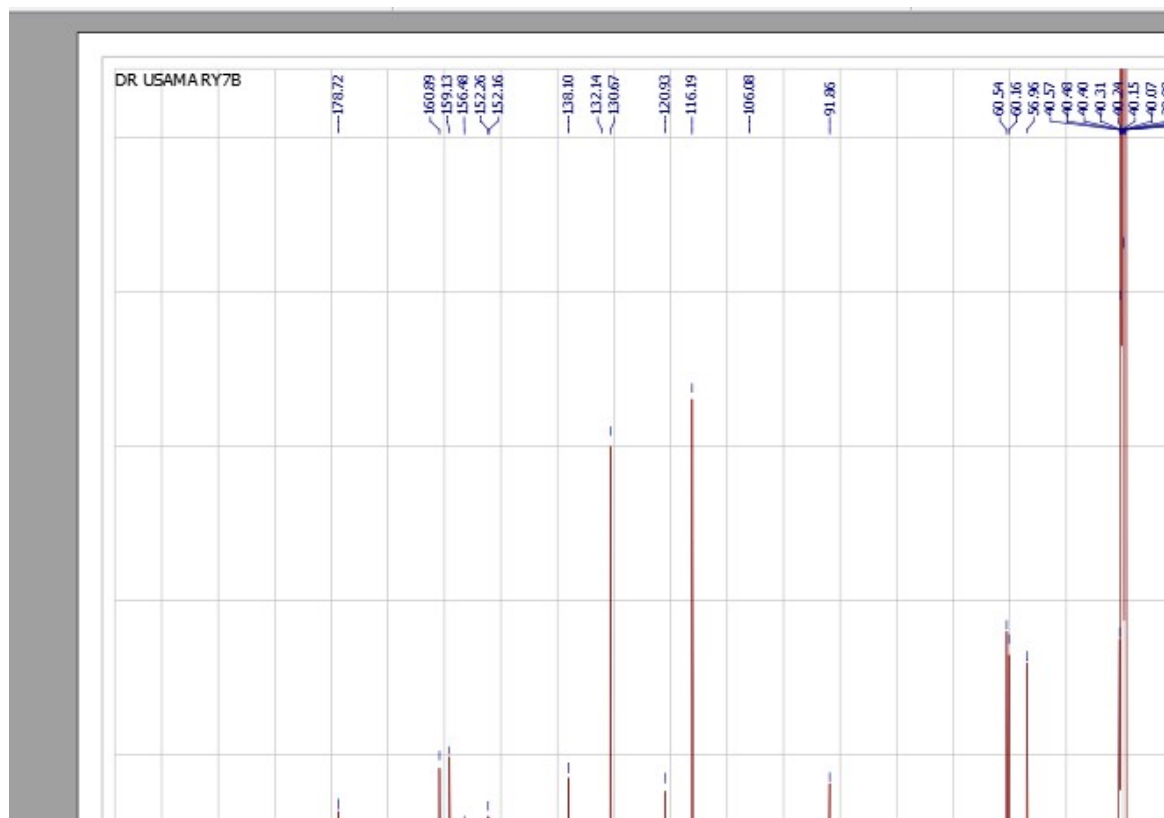

Figure S2:  $^{13}\text{C}$  NMR spectrum of compound 1 (DMSO- $d_6$ , 500 MHz)

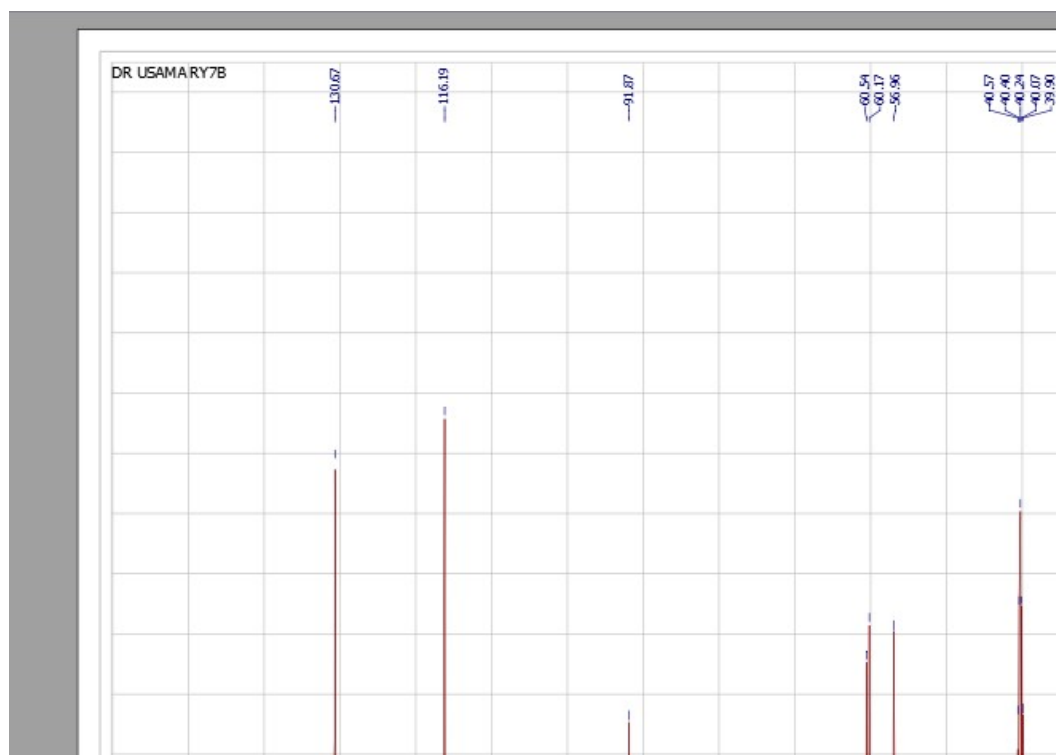

Figure S3:  $^{13}\text{C}$ -DEPT NMR spectrum of compound 1 ( $\text{DMSO-}d_6$ , 500 MHz)

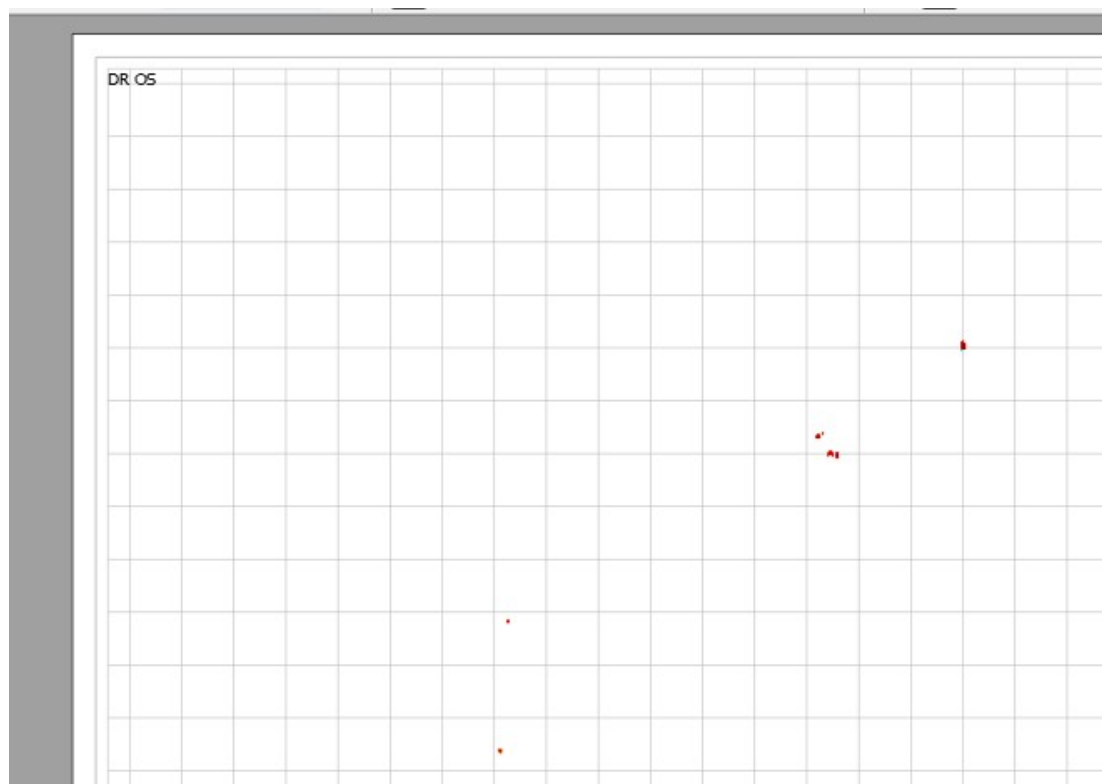

Figure S4: HSQC spectrum of compound 1 ( $\text{DMSO-}d_6$ , 500 MHz)

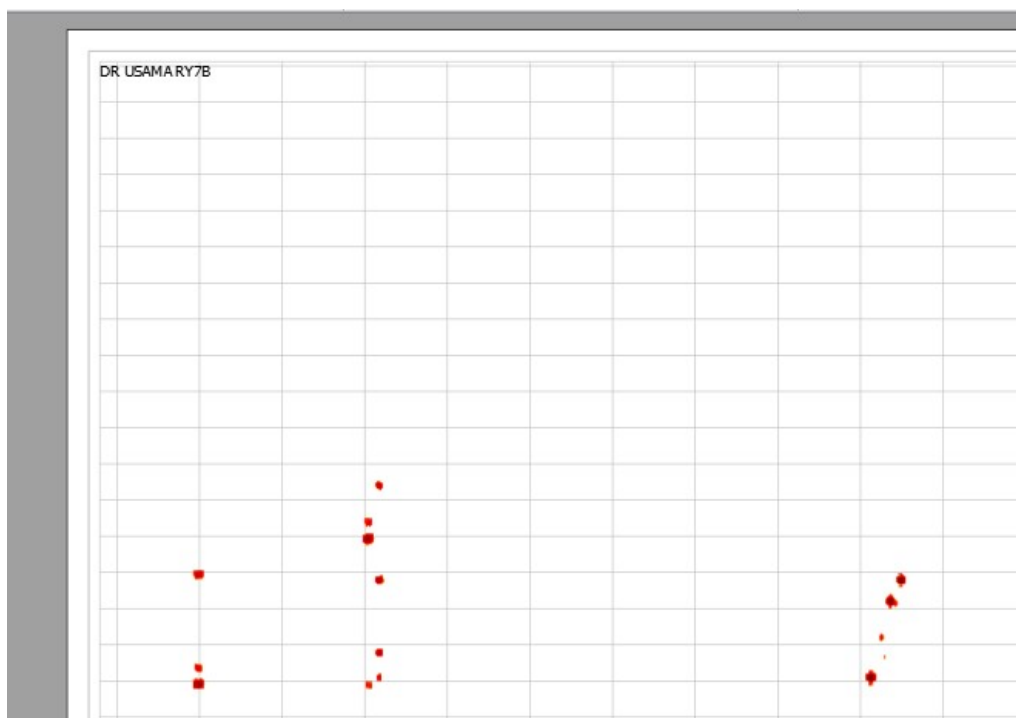

Figure S5: HMBC spectrum of compound 1 (DMSO- $d_6$ , 500 MHz)

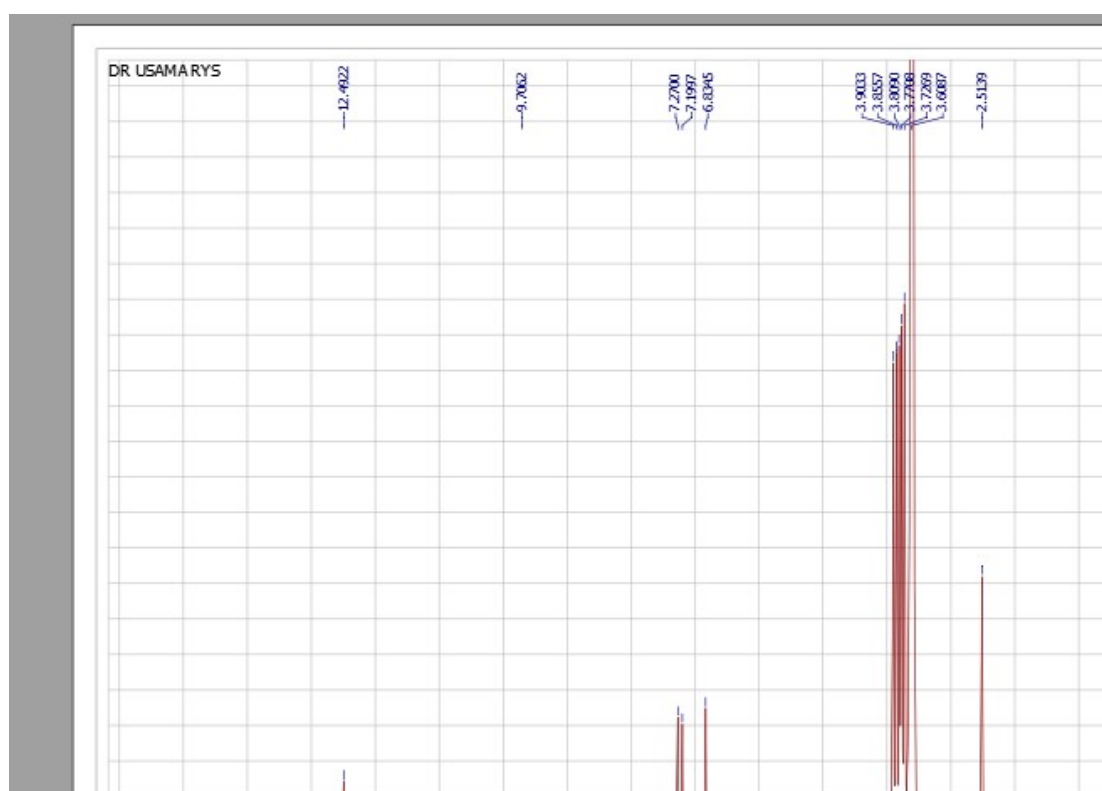

Figure S6:  $^1\text{H}$  NMR spectrum of compound 2 (DMSO- $d_6$ , 500 MHz)

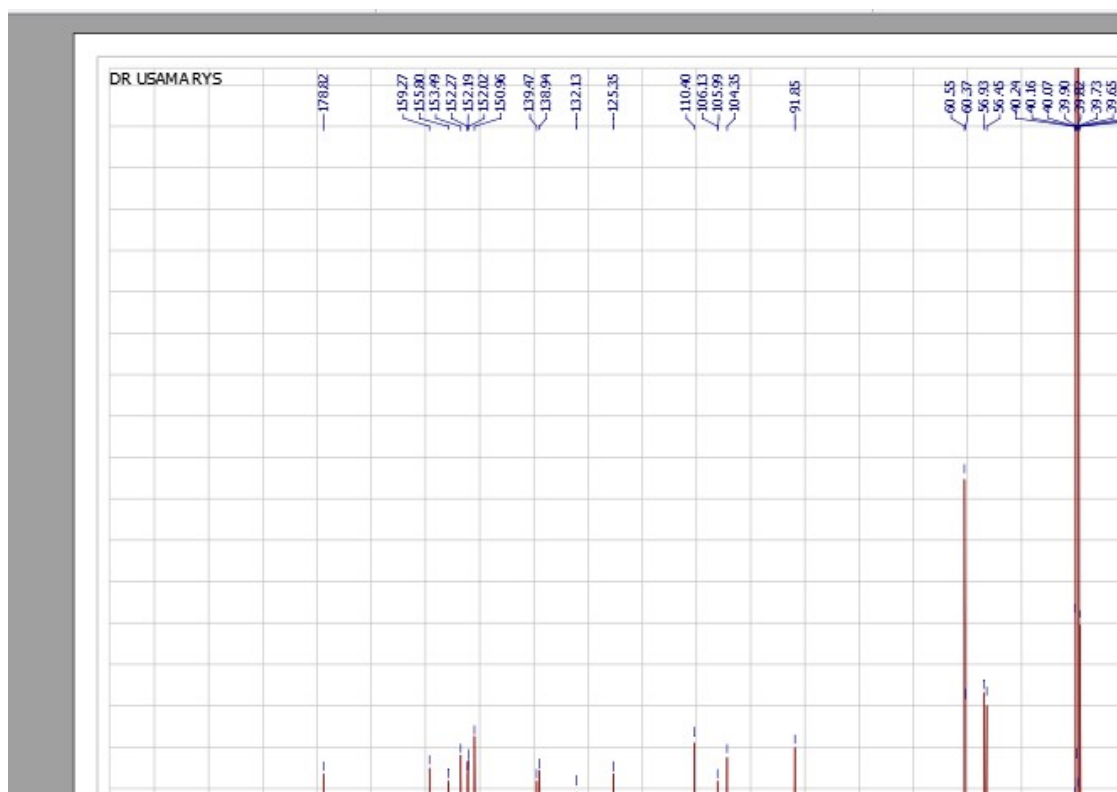

Figure S7:  $^{13}\text{C}$  NMR spectrum of compound 2 ( $\text{DMSO-}d_6$ , 500 MHz)

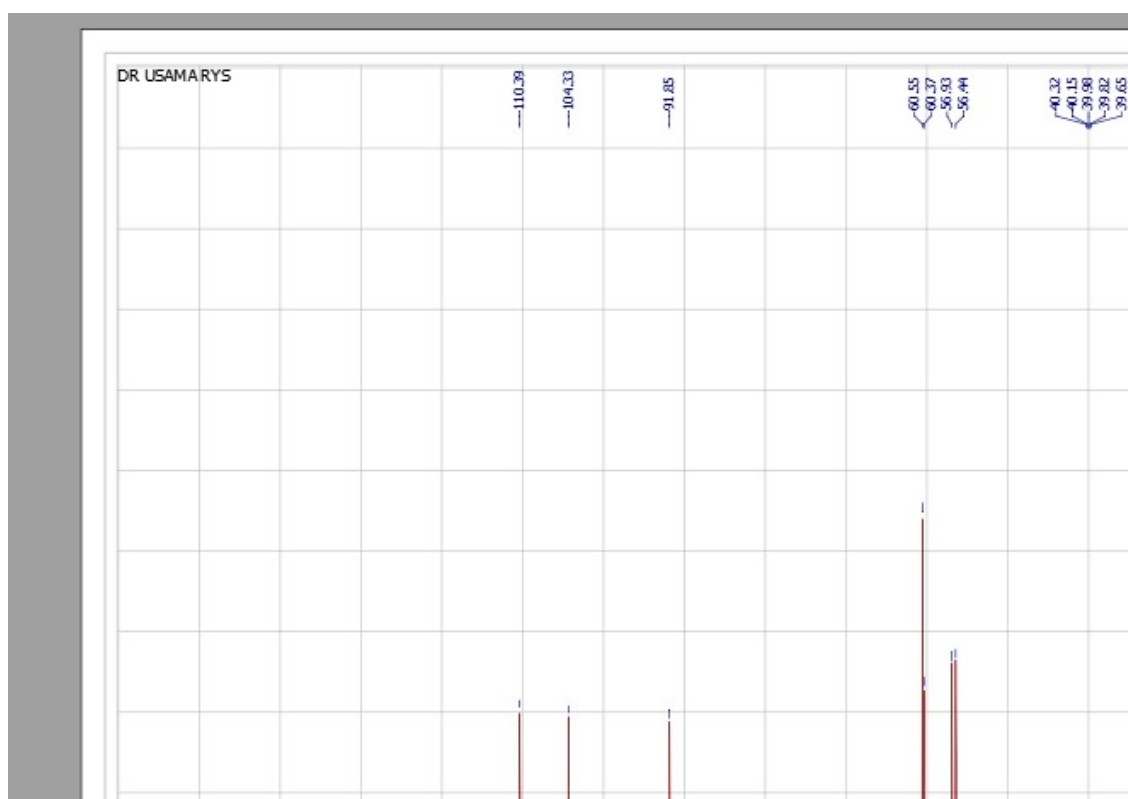

Figure S8:  $^{13}\text{C}$ -DEPT NMR spectrum of compound 2 ( $\text{DMSO-}d_6$ , 500 MHz)

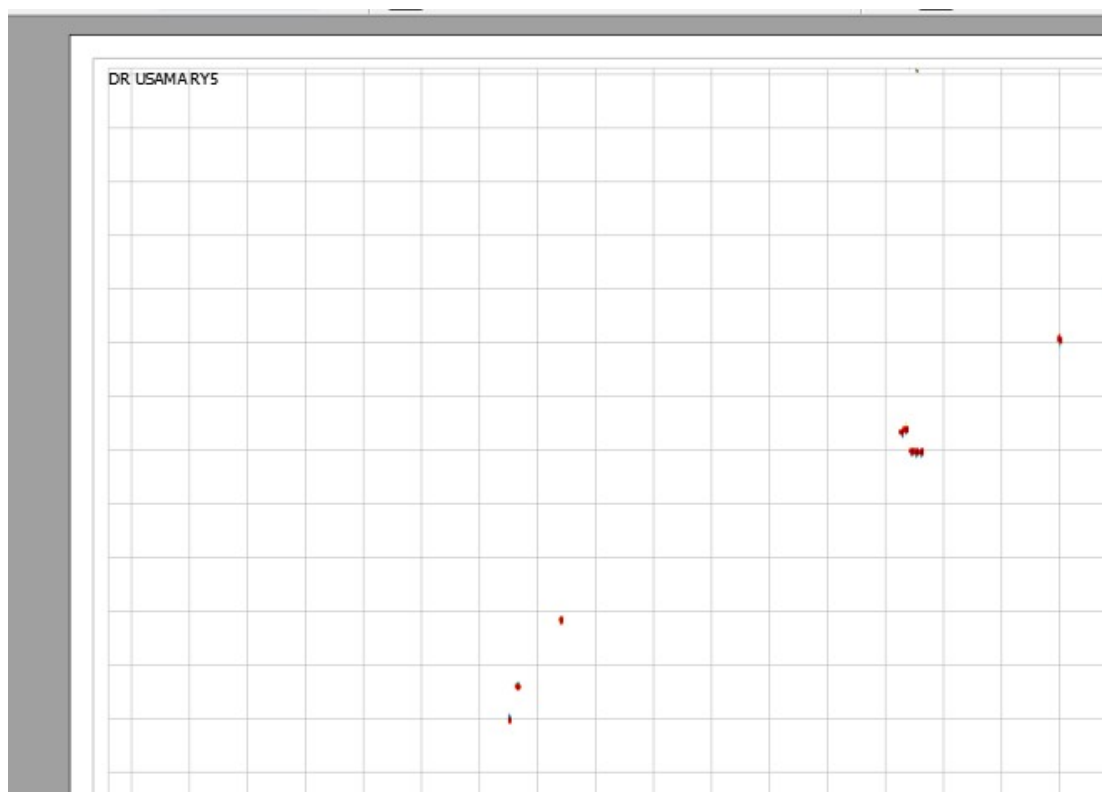

Figure S9: HSQC spectrum of compound 2 (DMSO-*d*<sub>6</sub>, 500 MHz)

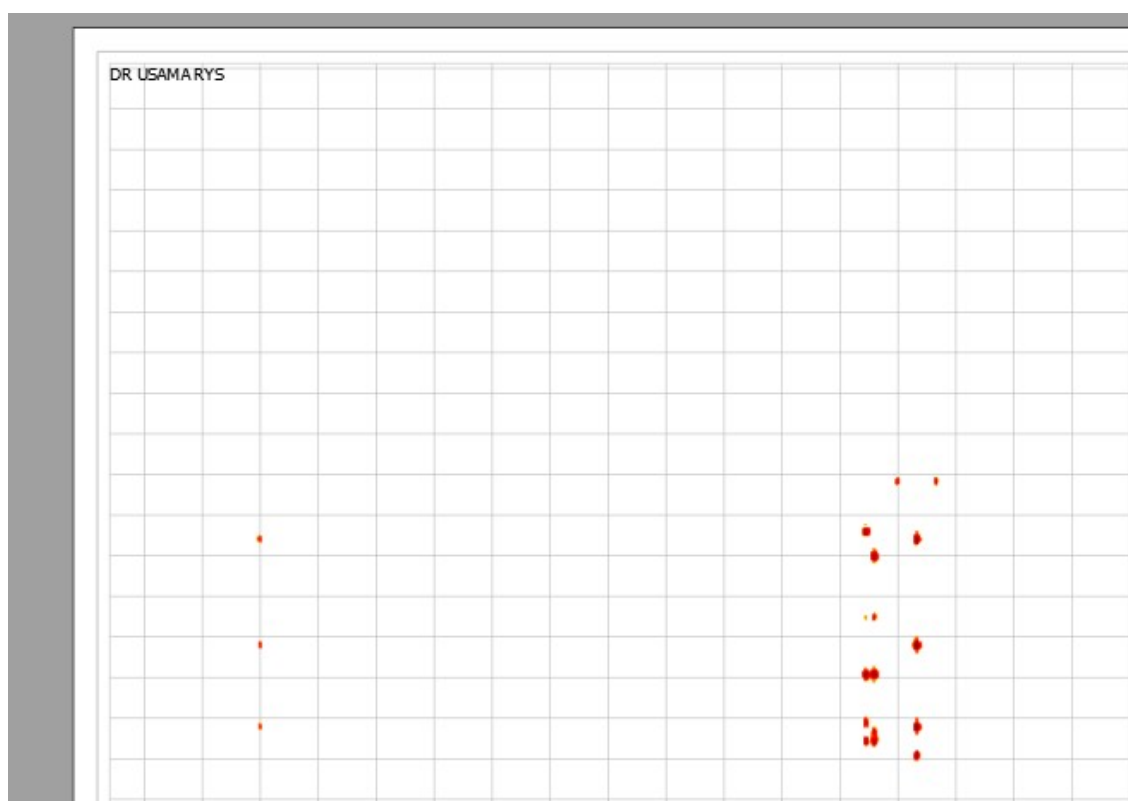

Figure S10: HMBC spectrum of compound 2 (DMSO-*d*<sub>6</sub>, 500 MHz)

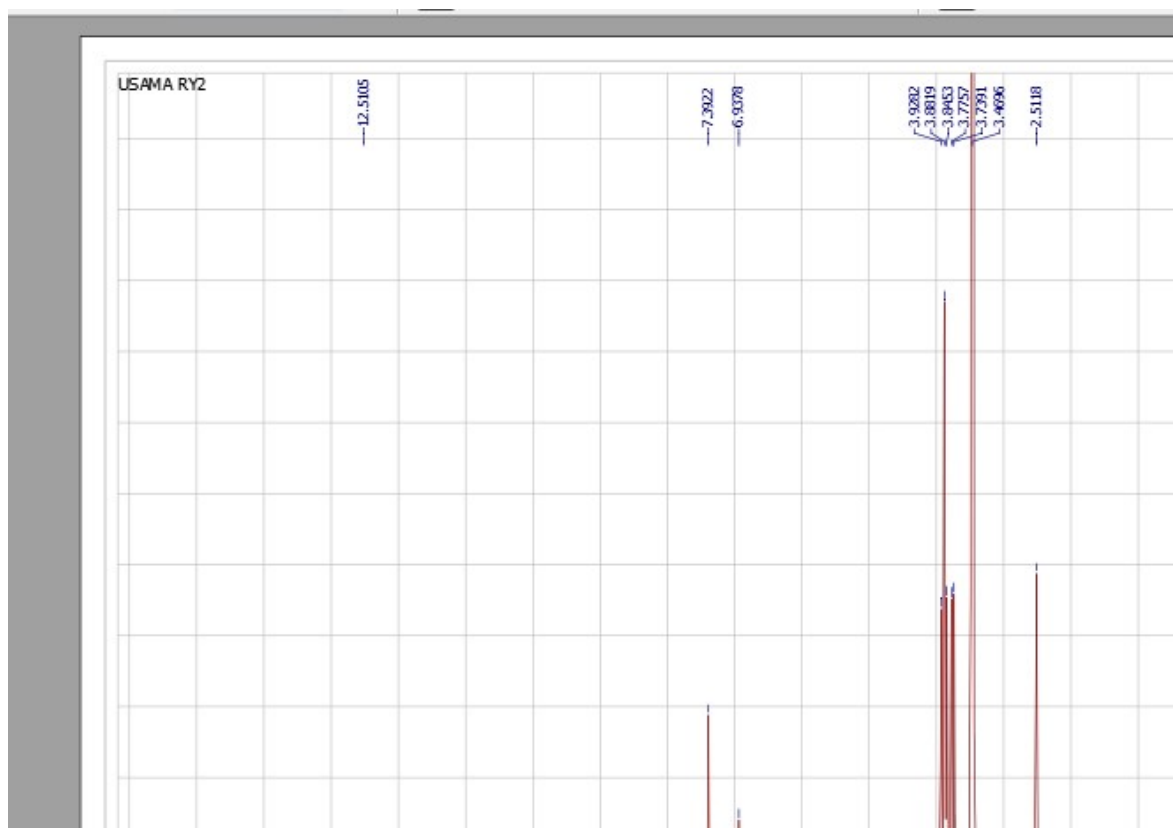

Figure S11:  $^1\text{H}$  NMR spectrum of compound 3 ( $\text{DMSO-}d_6$ , 500 MHz)

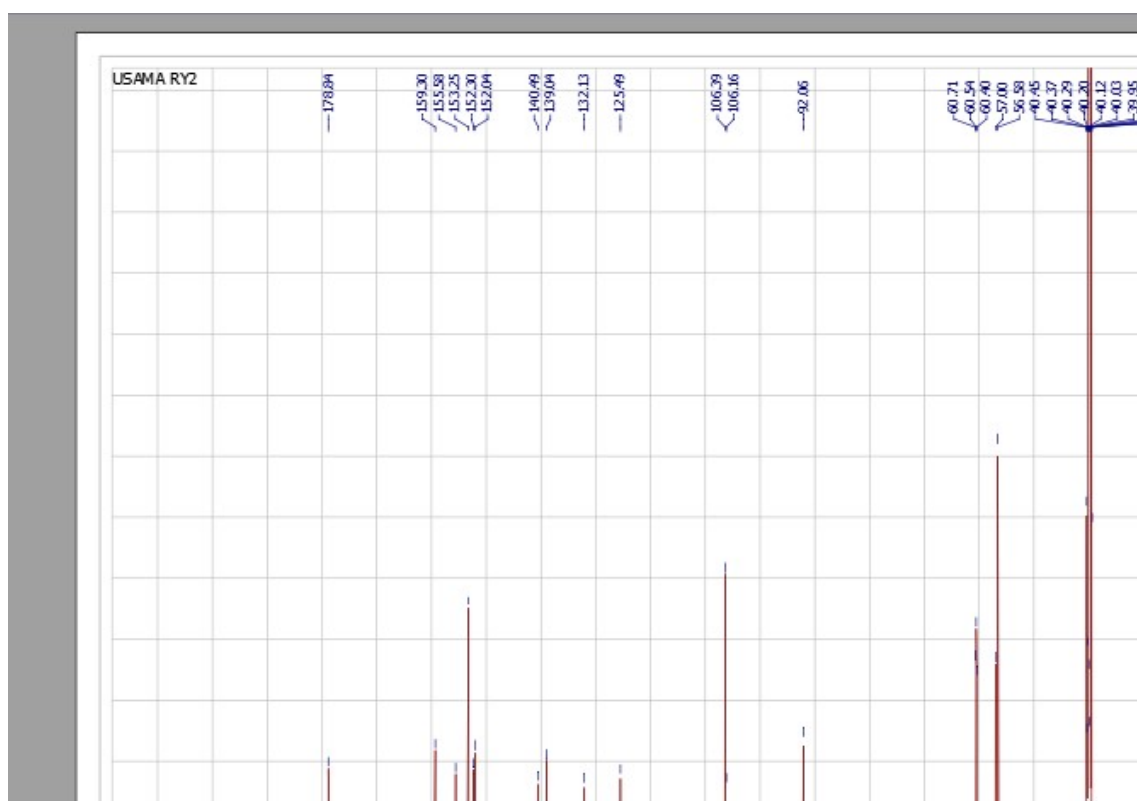

Figure S12:  $^{13}\text{C}$  NMR spectrum of compound 3 ( $\text{DMSO-}d_6$ , 500 MHz)

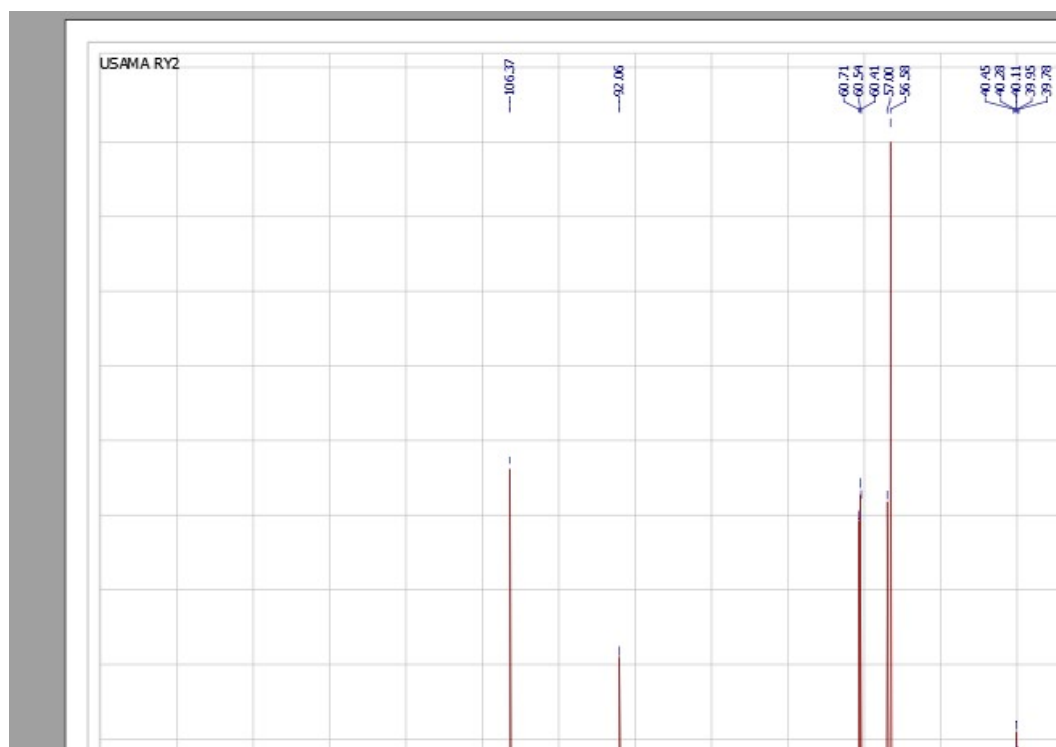

Figure S13:  $^{13}\text{C}$ -DEPT NMR spectrum of compound 3 ( $\text{DMSO-}d_6$ , 500 MHz)

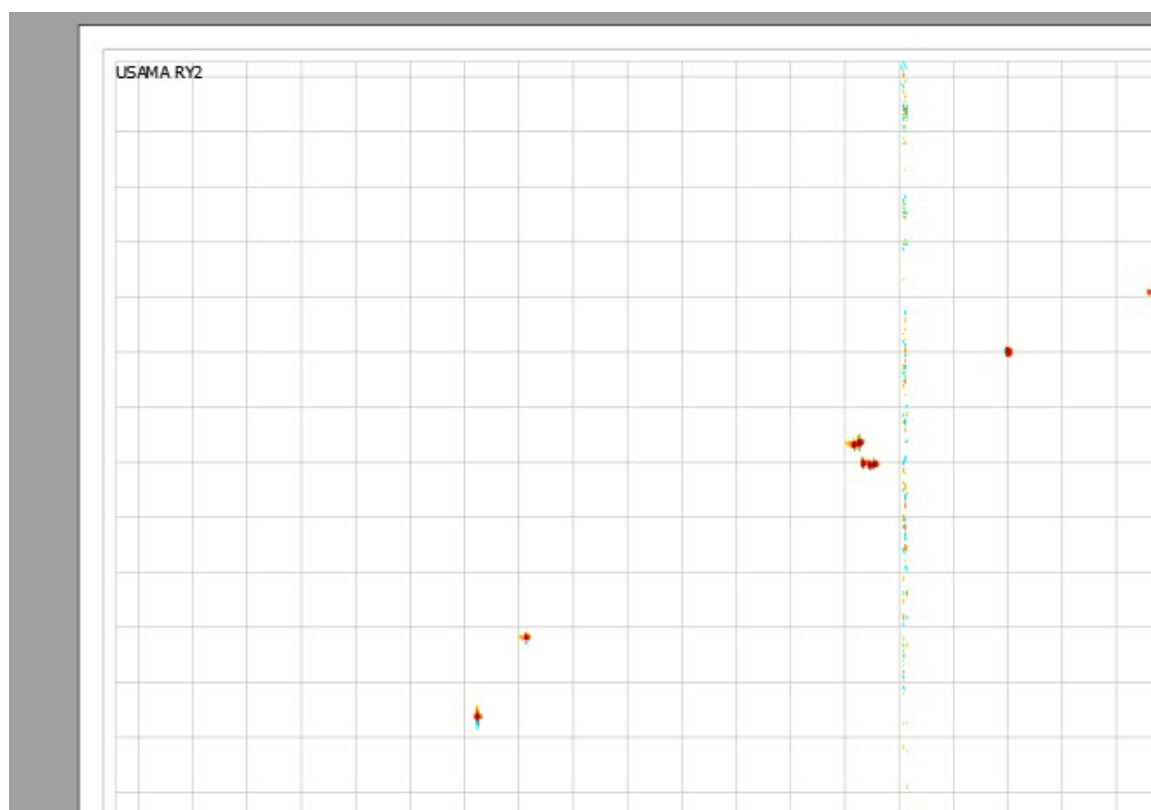

Figure S14: HSQC spectrum of compound 3 ( $\text{DMSO-}d_6$ , 500 MHz)

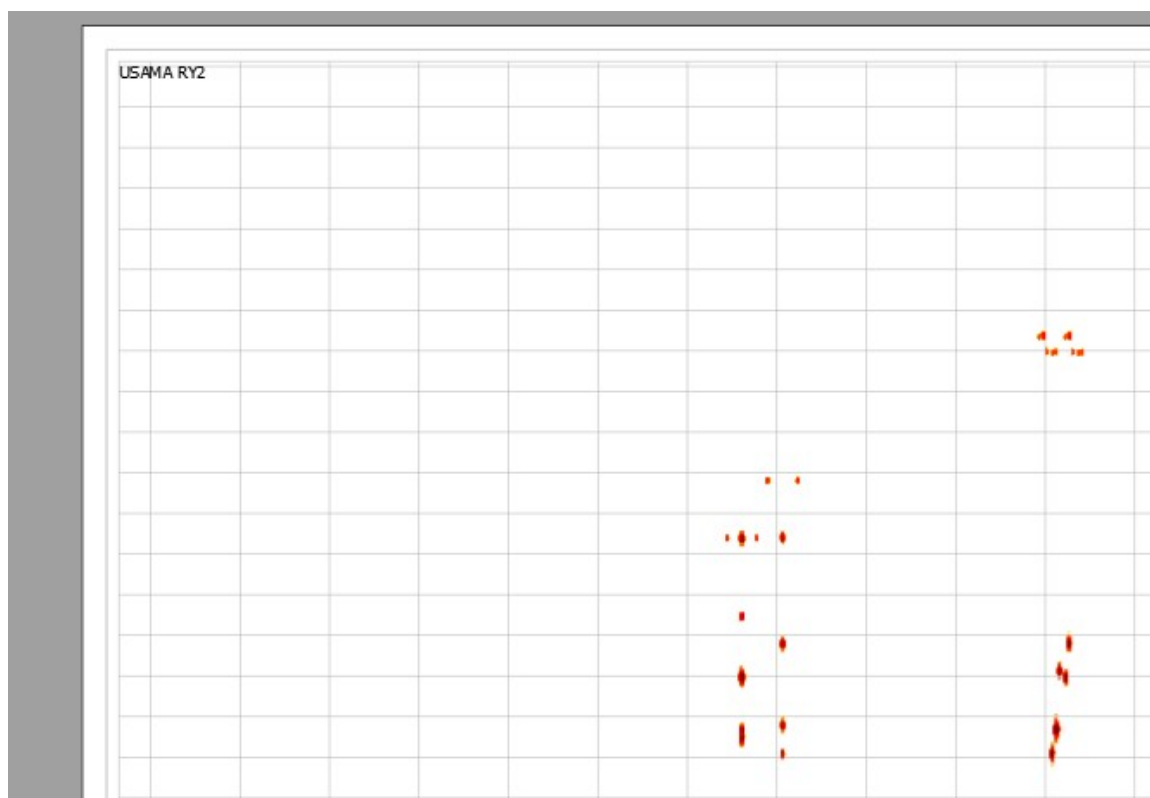

Figure S15: HMBC spectrum of compound 3 (DMSO- $d_6$ , 500 MHz)

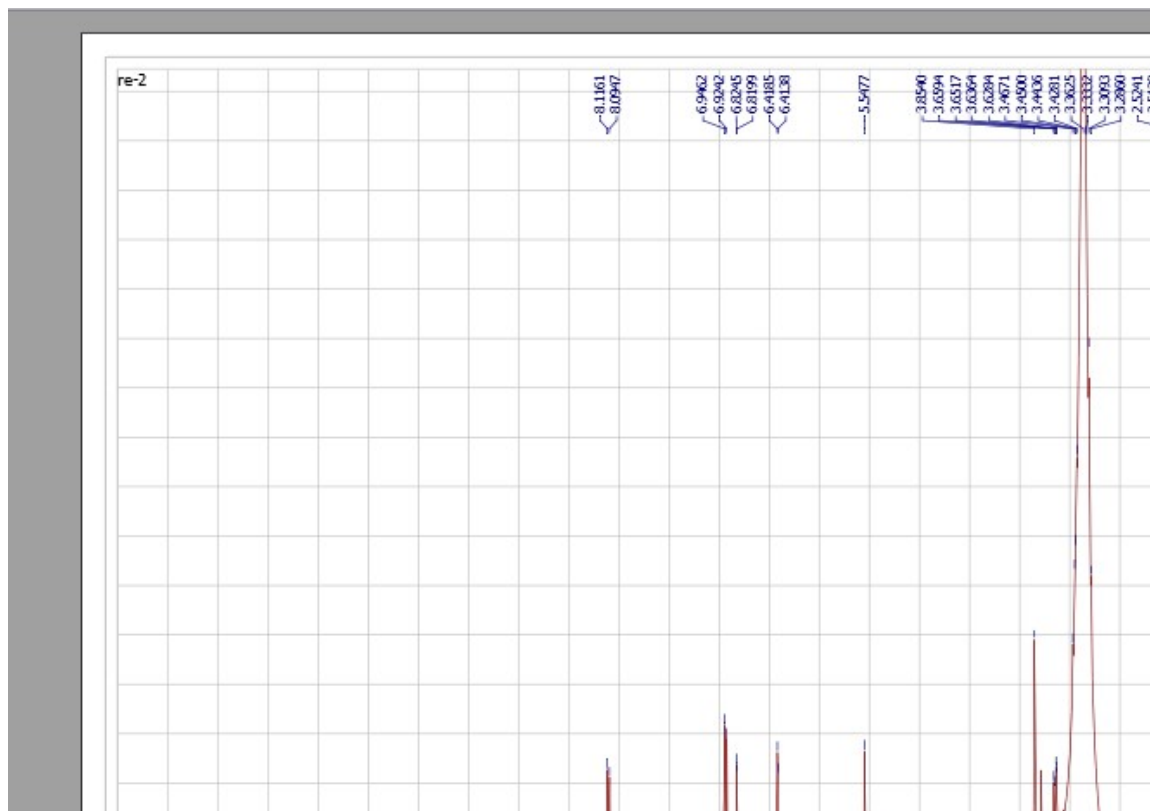

Figure S16:  $^1\text{H}$  NMR spectrum of compound 4 (DMSO- $d_6$ , 400 MHz)



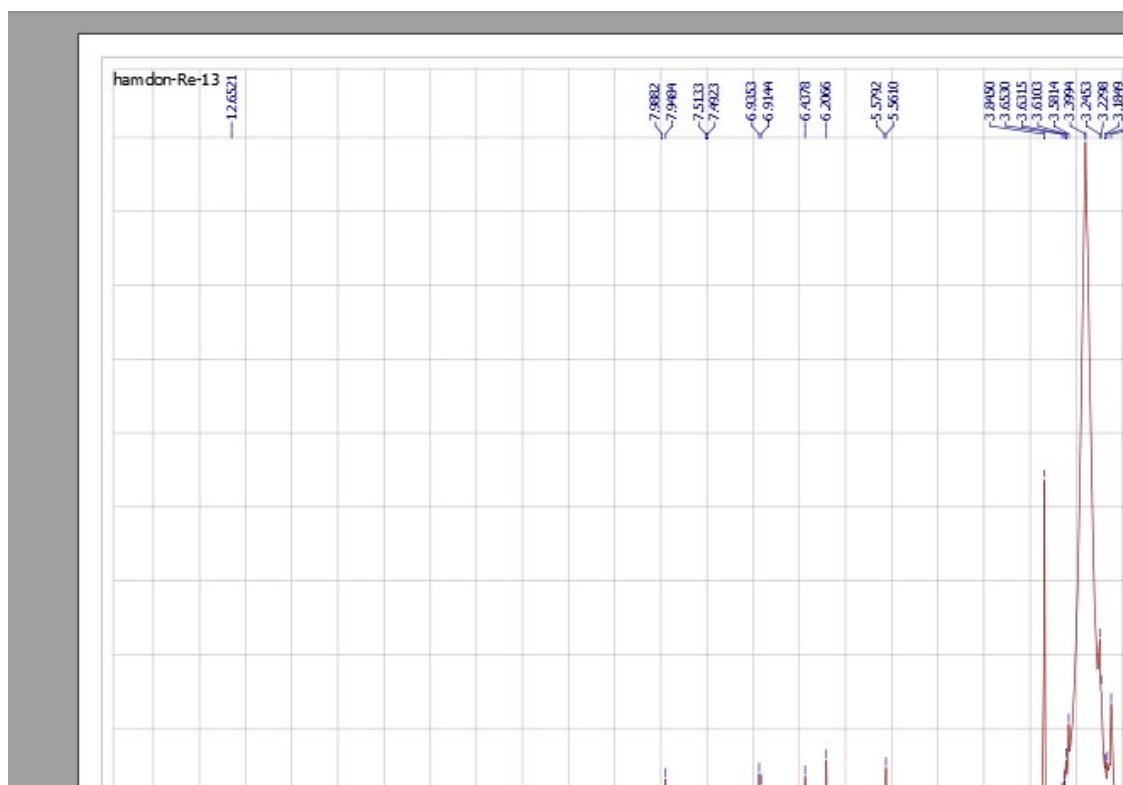

Figure S17:  $^1\text{H}$  NMR spectrum of compound 5 ( $\text{DMSO}-d_6$ , 400 MHz)

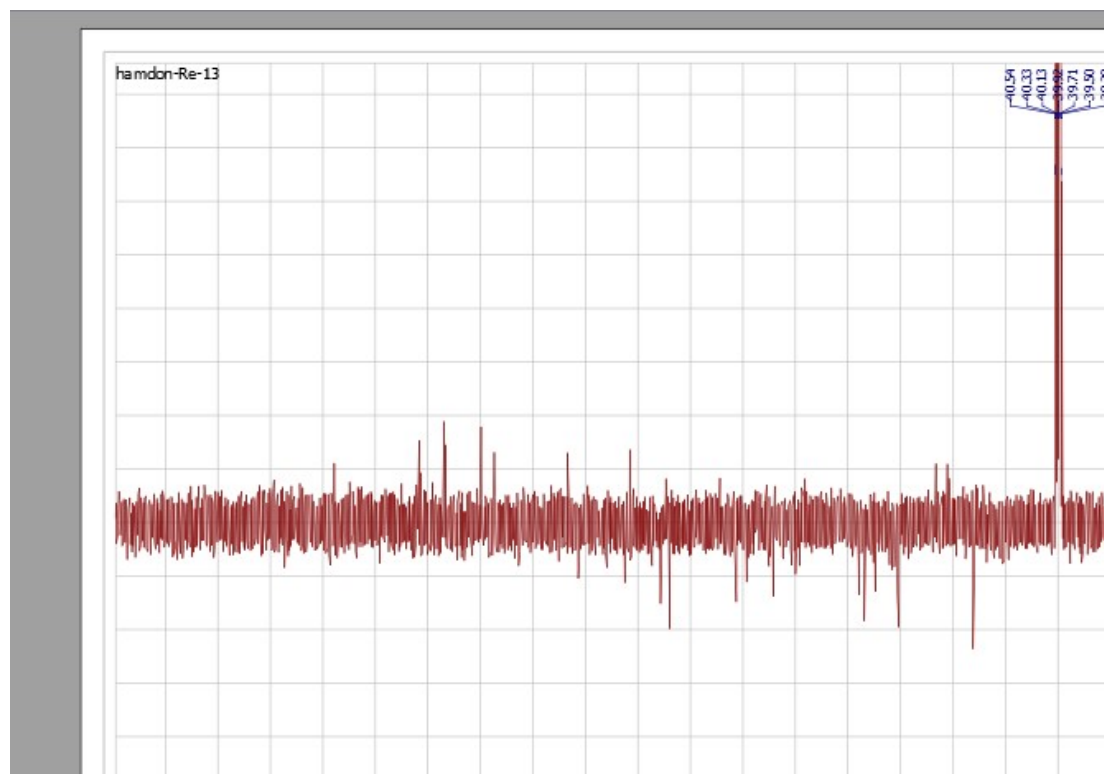

Figure S18:  $^{13}\text{C}$ -APT NMR spectrum of compound 5 ( $\text{DMSO}-d_6$ , 400 MHz)

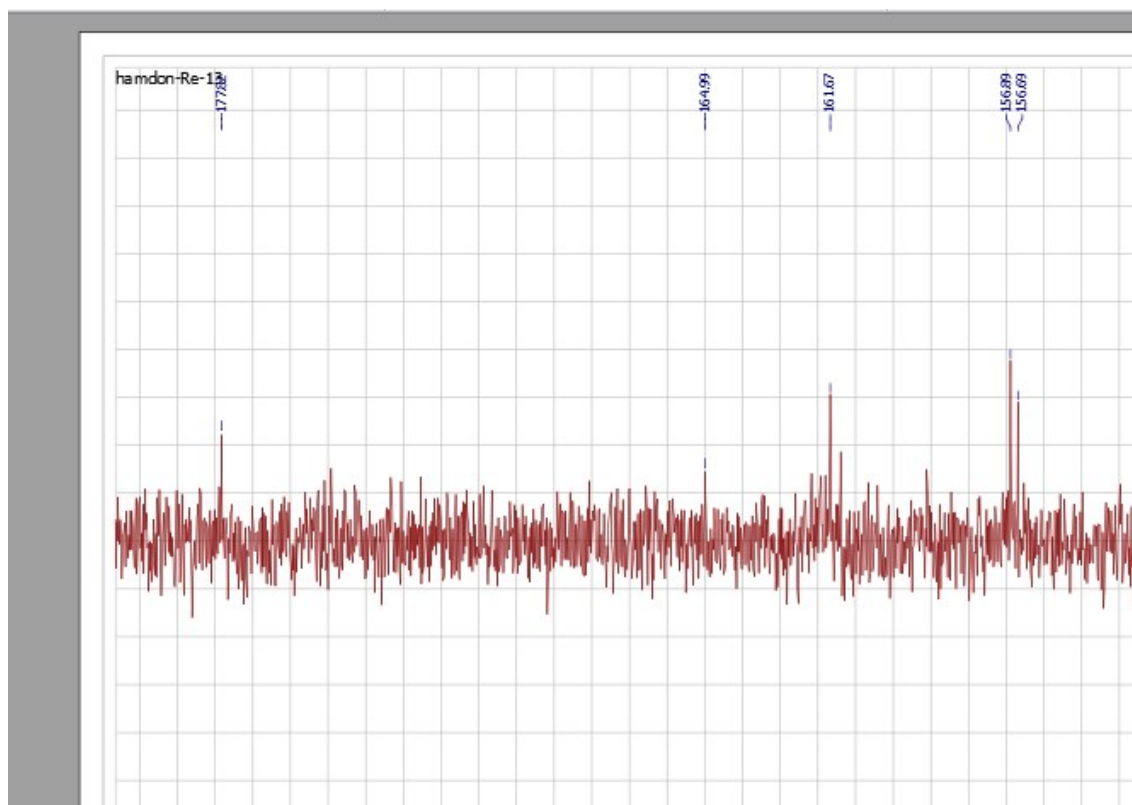

Figure S19: Expanded <sup>13</sup>C-APT NMR spectrum of compound 5 (DMSO-*d*<sub>6</sub>, 400 MHz)

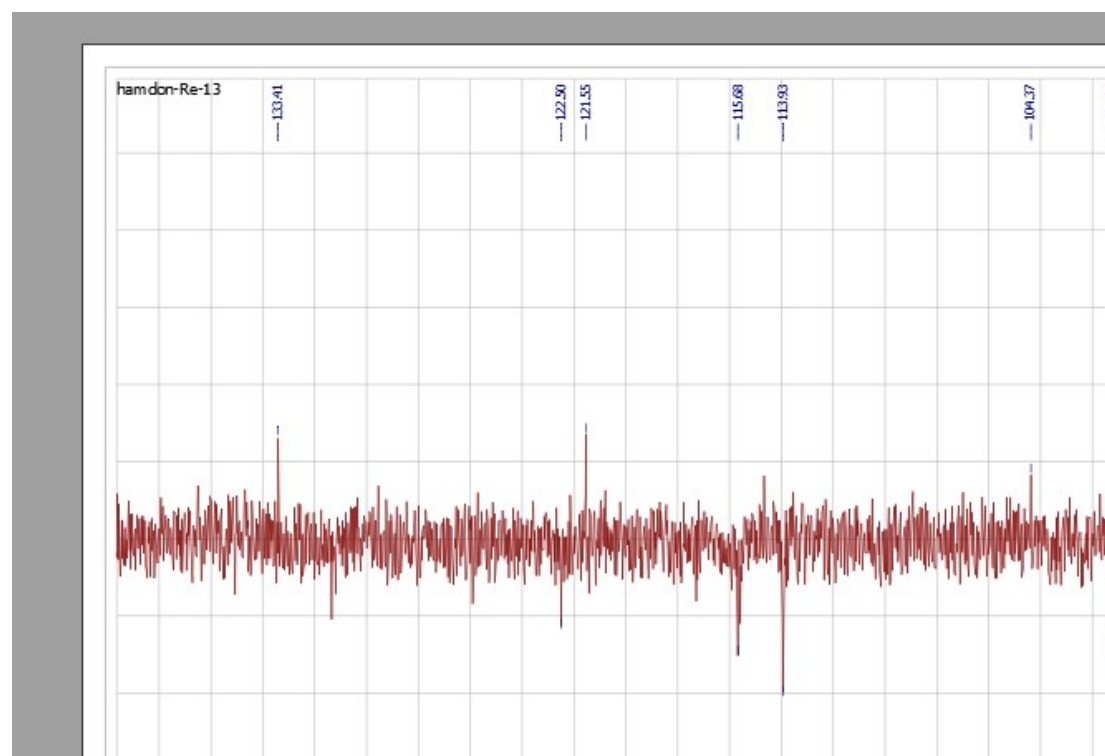

Figure S20: Expanded <sup>13</sup>C-APT NMR spectrum of compound 5 (DMSO-*d*<sub>6</sub>, 400 MHz)

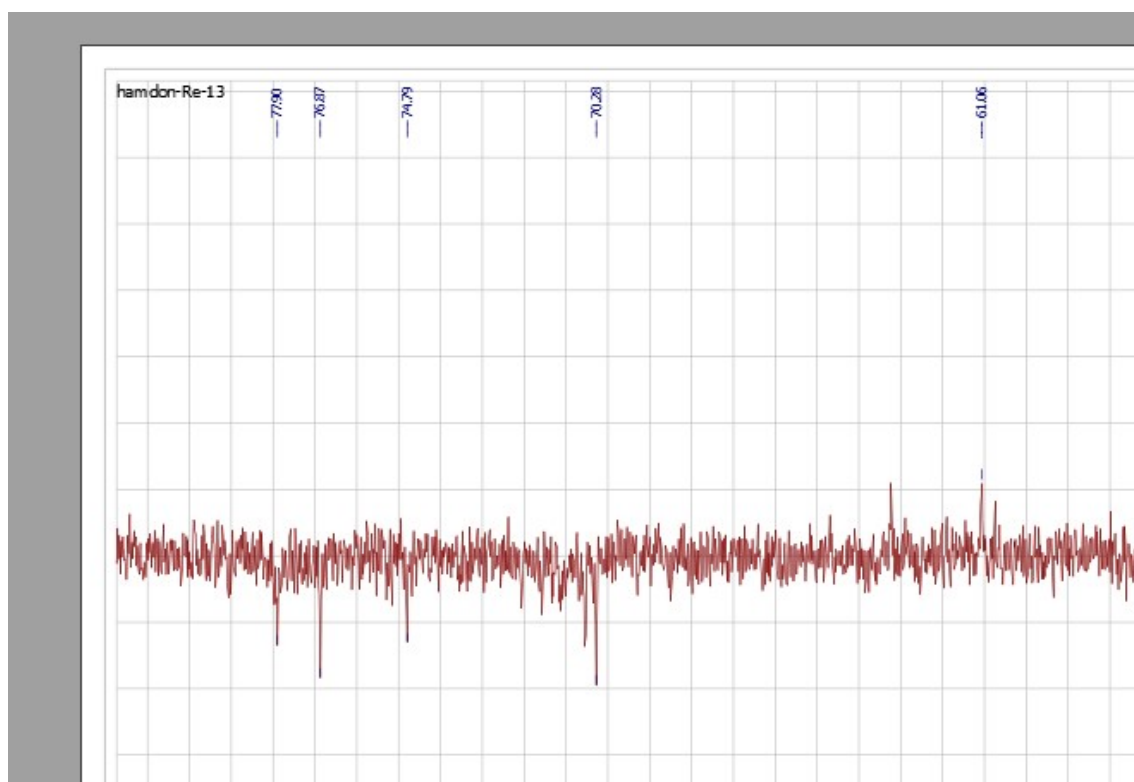

Figure S21: Expanded  $^{13}\text{C}$ -APT NMR spectrum of compound 5 (DMSO- $d_6$ , 400 MHz)

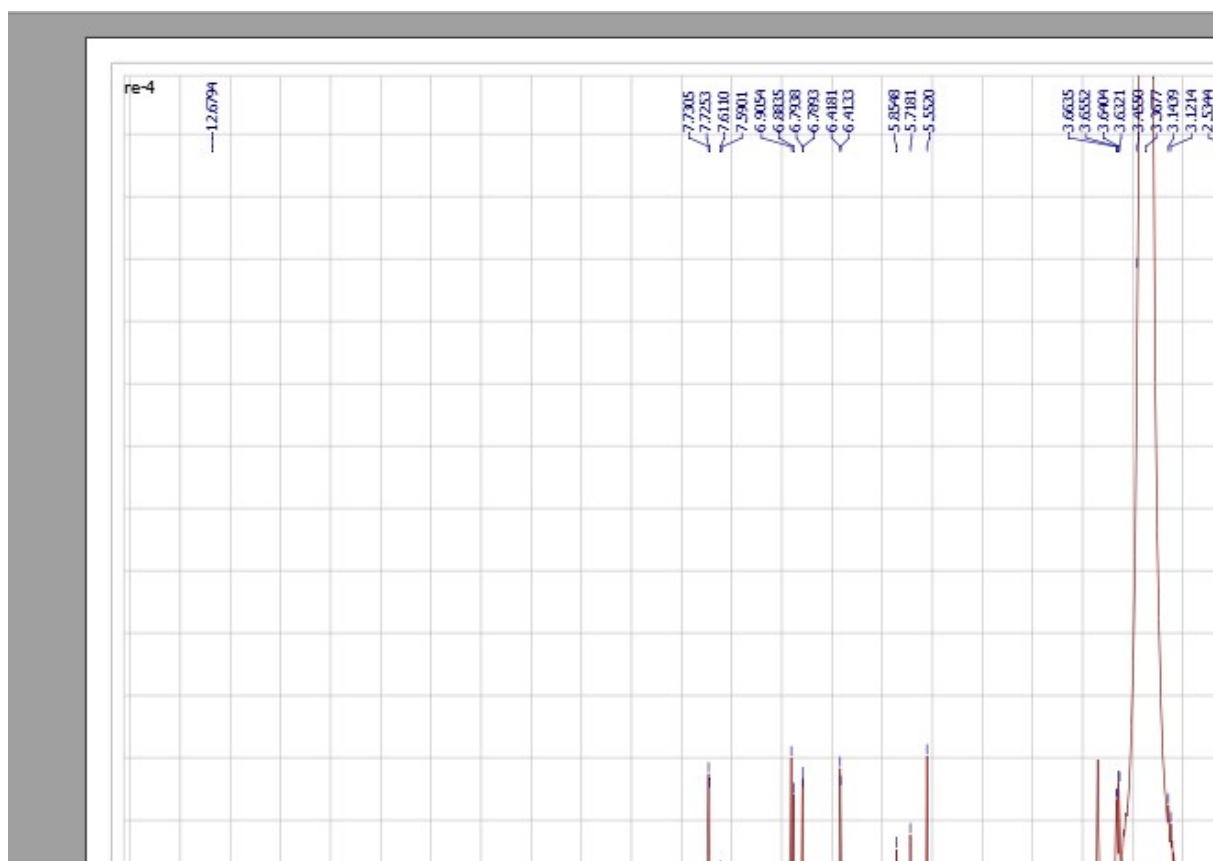

Figure S22:  $^1\text{H}$  NMR spectrum of compound 6 (DMSO- $d_6$ , 400 MHz)

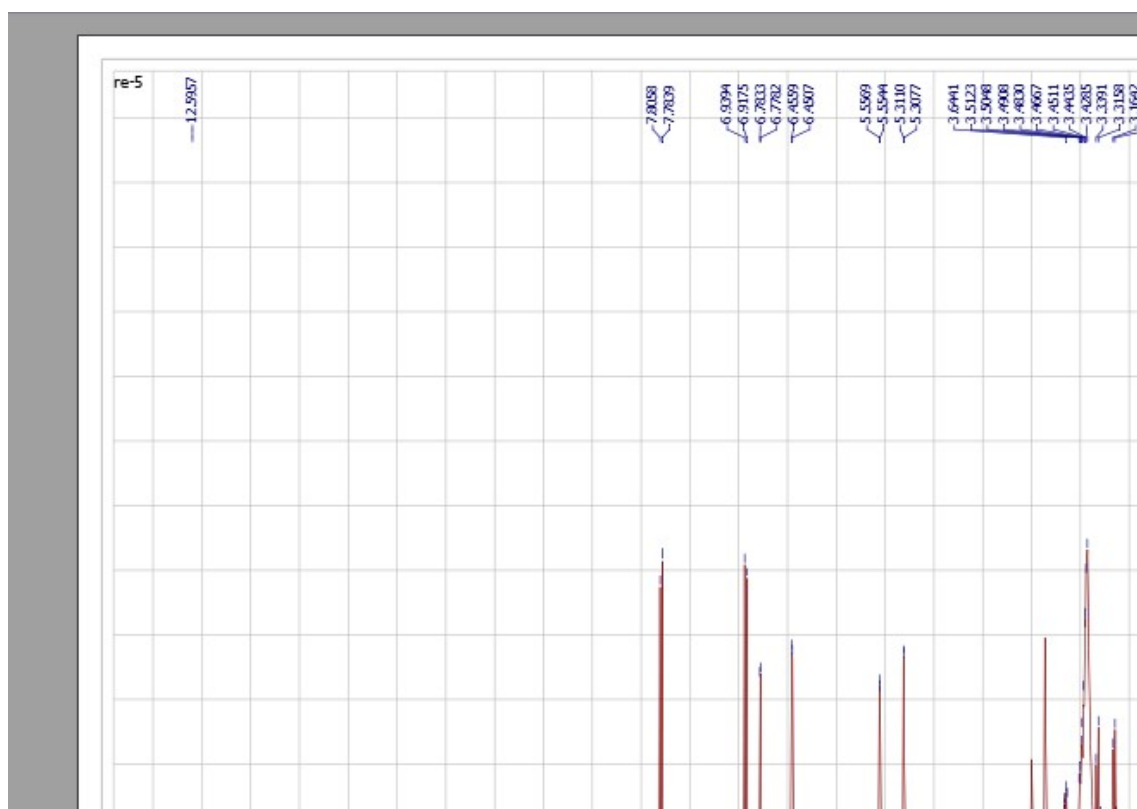

Figure S23:  $^1\text{H}$  NMR spectrum of compound 7 (DMSO- $d_6$ , 400 MHz)

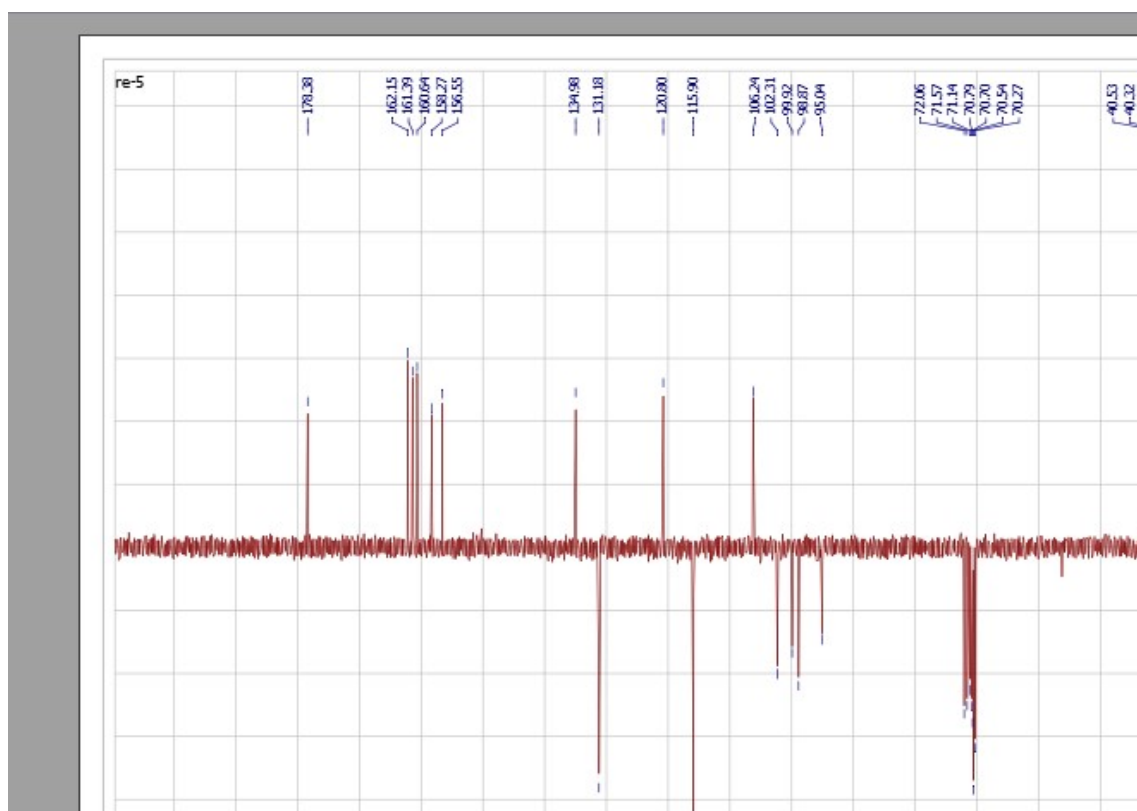

Figure S24:  $^{13}\text{C}$ -APT NMR spectrum of compound 7 (DMSO- $d_6$ , 400 MHz)

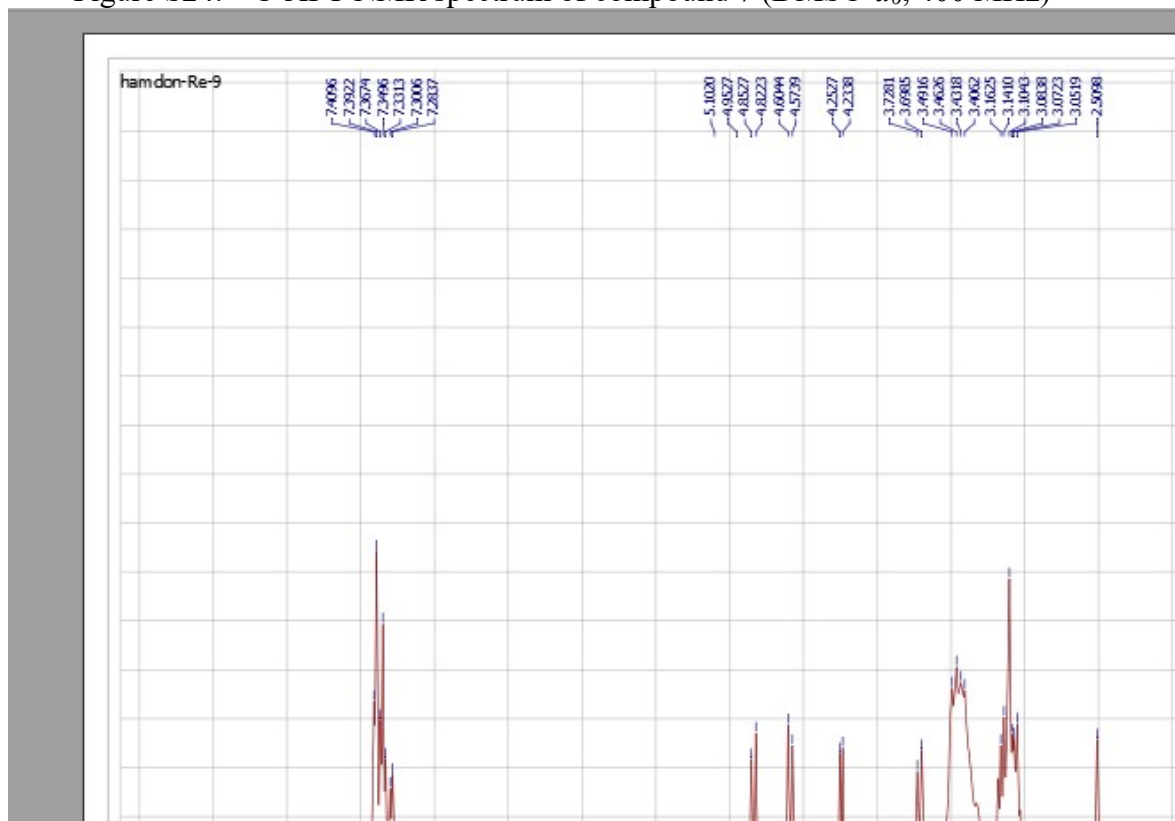

Figure S25:  $^1\text{H}$  NMR spectrum of compound 8 (DMSO- $d_6$ , 400 MHz)

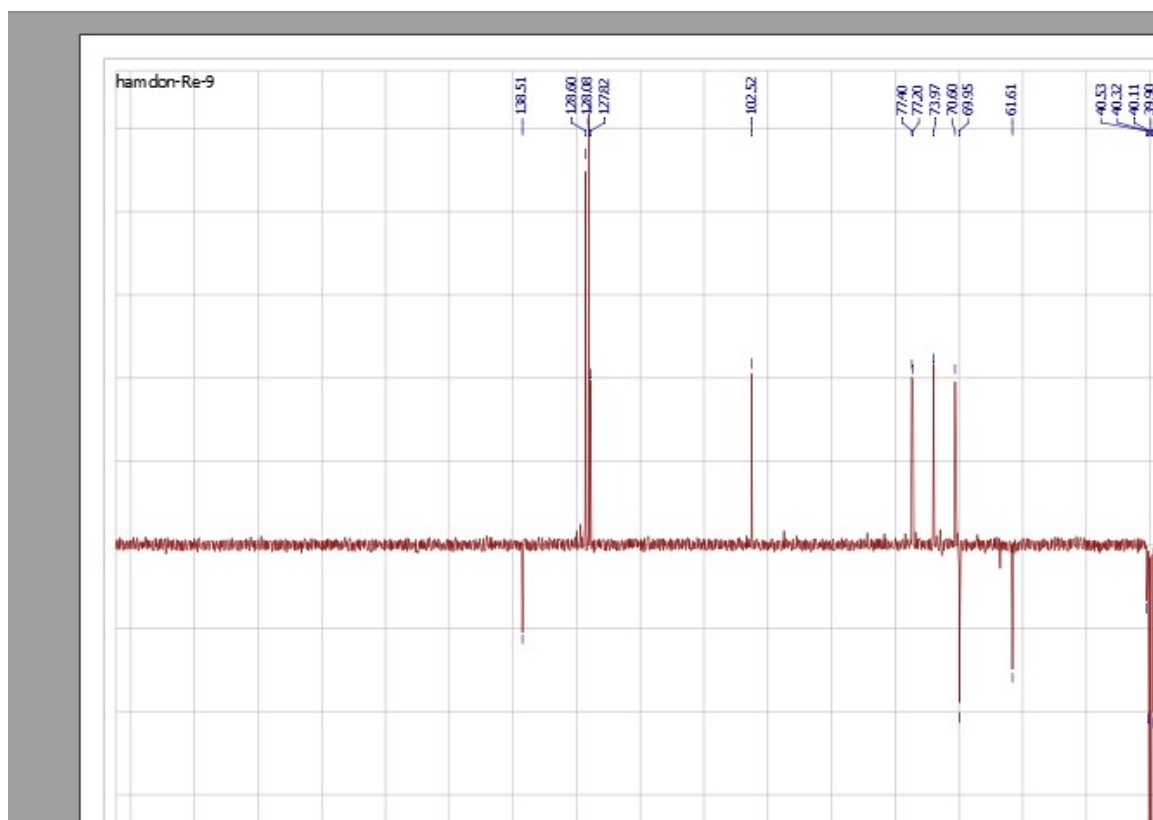

Figure S26:  $^{13}\text{C}$ -APT NMR spectrum of compound 8 ( $\text{DMSO-}d_6$ , 400 MHz)

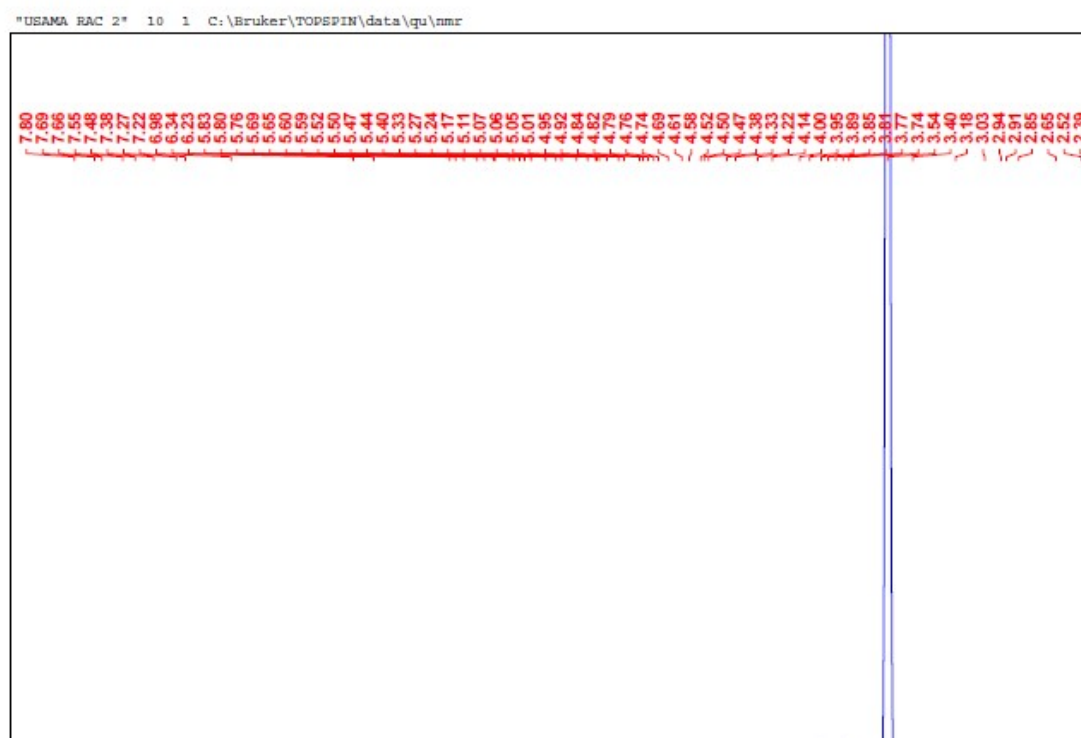

Figure S27:  $^1\text{H}$  NMR spectrum of compound 9 ( $\text{DMSO-}d_6$ , 500 MHz)

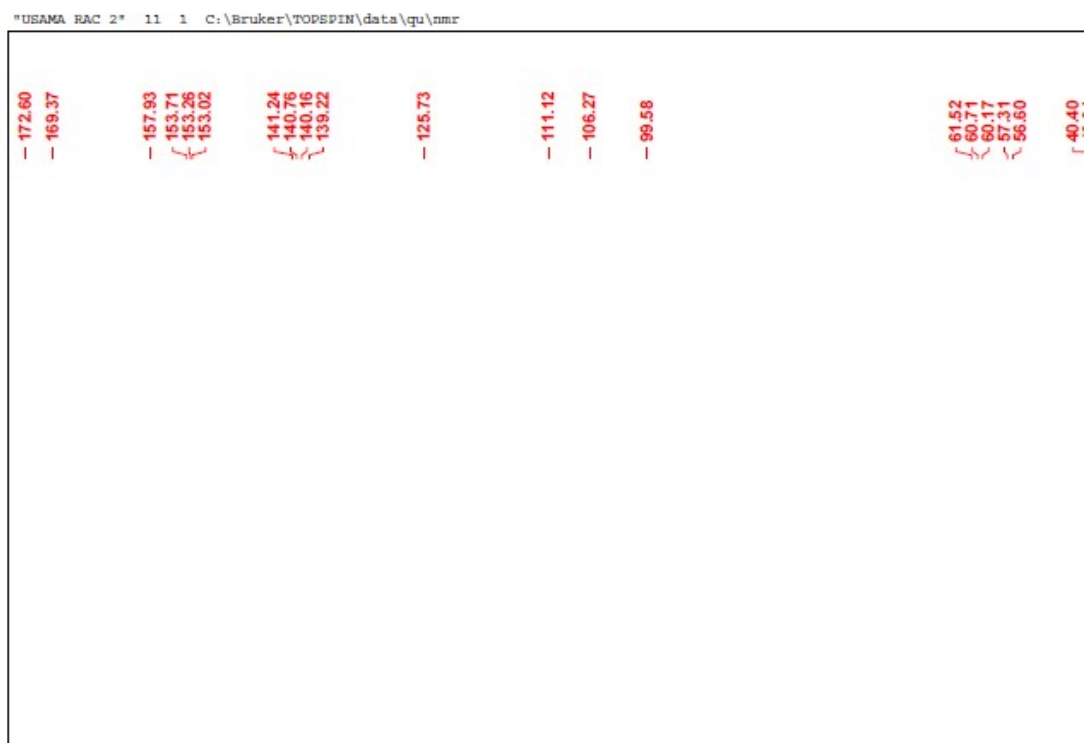

Figure S28:  $^{13}\text{C}$  NMR spectrum of compound 9 (DMSO- $d_6$ , 500 MHz)

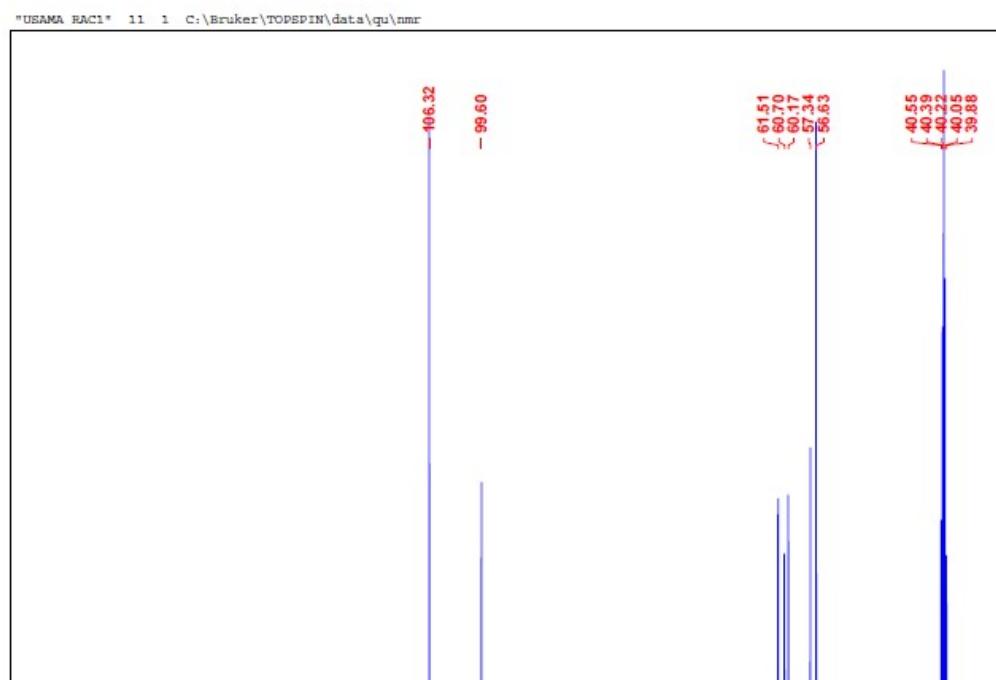

Figure S29:  $^{13}\text{C}$ -DEPT NMR spectrum of compound 9 (DMSO- $d_6$ , 500 MHz)

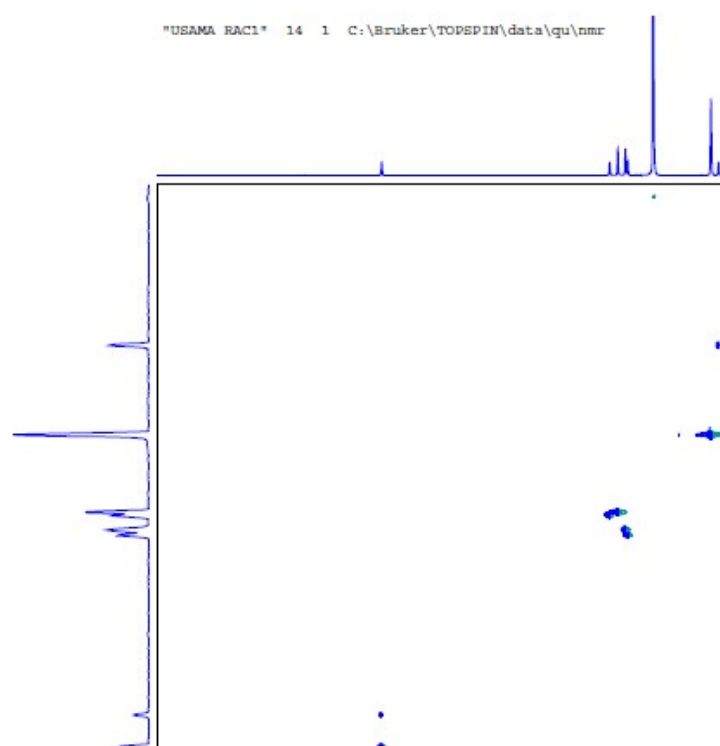

Figure S30: HSQC spectrum of compound 9 (DMSO- $d_6$ , 500 MHz)

---

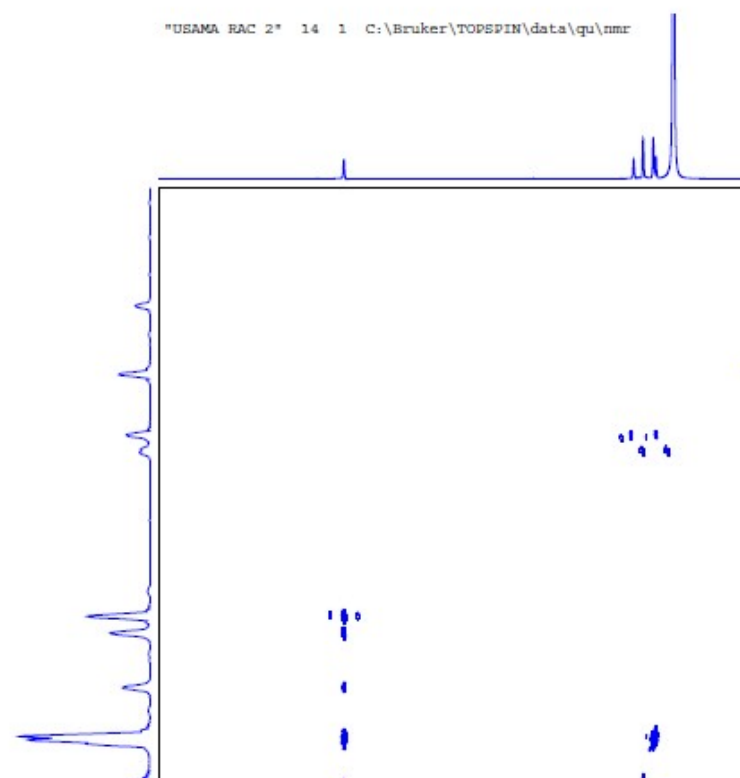

Figure S31: HMBC spectrum of compound 9 (DMSO- $d_6$ , 500 MHz)



**Scheme S1: Extraction, fractionation and isolation of chemical constituents of *Rhamnus disperma* roots.**

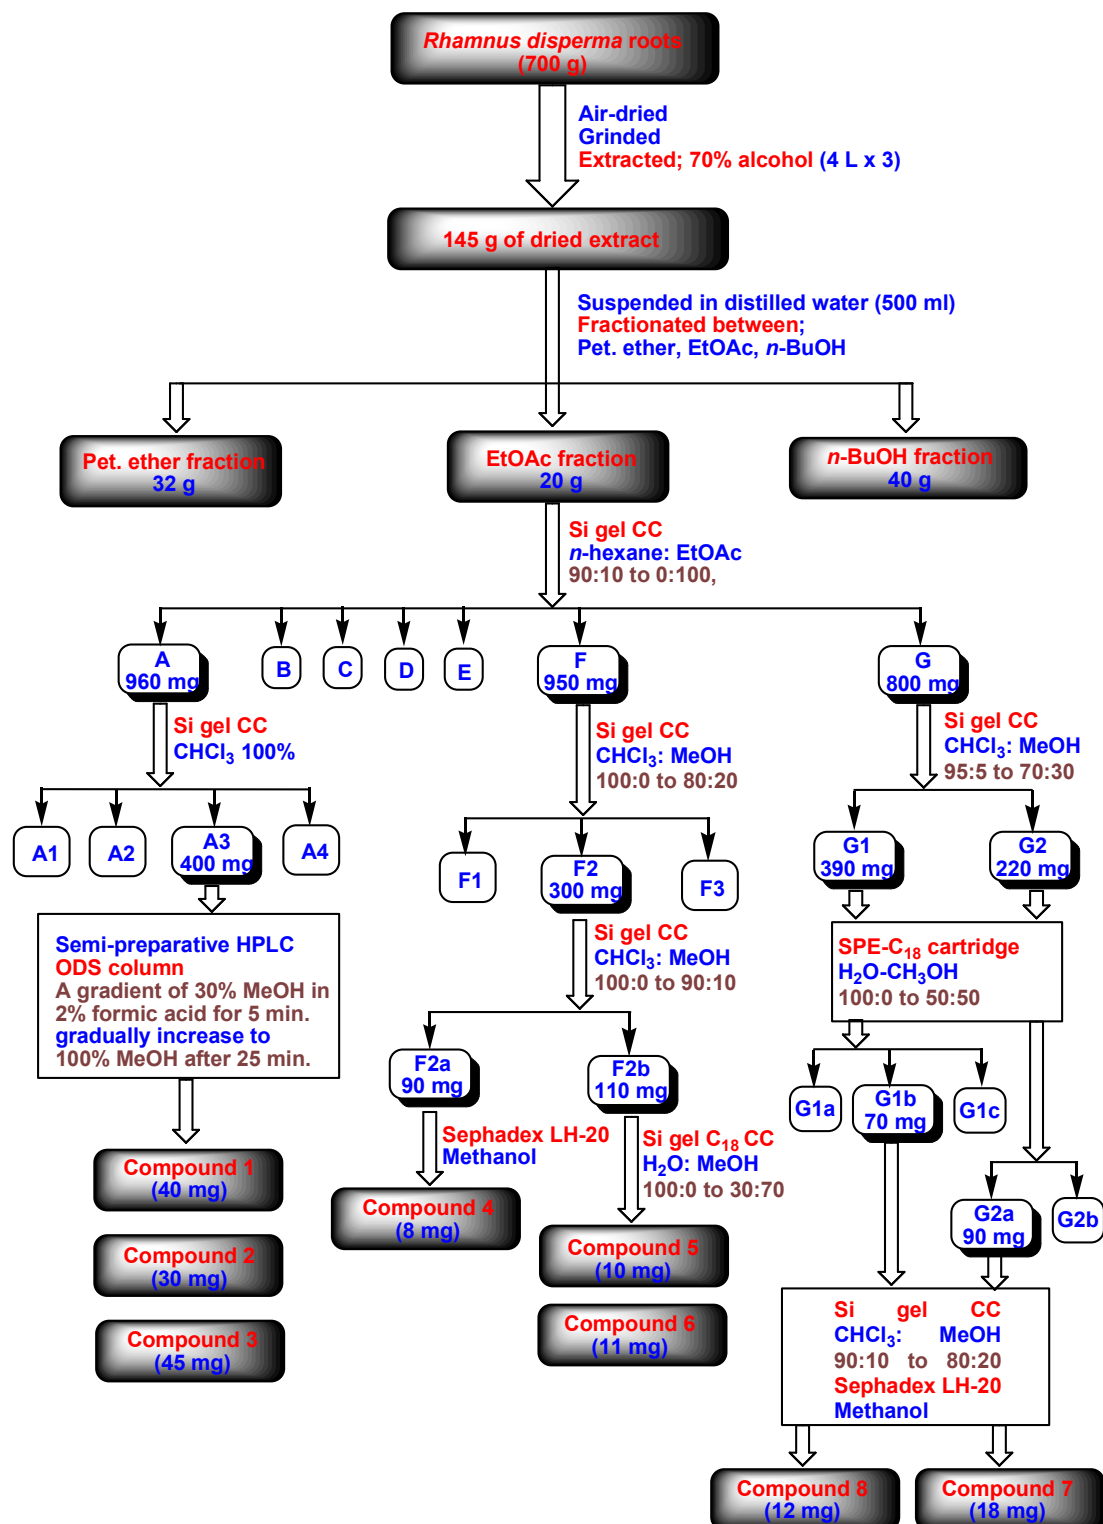

Table S1: NMR spectral data of compound 1 (DMSO-*d*<sub>6</sub>, 500 MHz)

| Position             | <sup>1</sup> H | <sup>13</sup> C | DEPT            | HMBC          |
|----------------------|----------------|-----------------|-----------------|---------------|
| 2                    | -              | 156.48          | C               | -             |
| 3                    | -              | 138.10          | C               | -             |
| 4                    | -              | 178.72          | C               | -             |
| 5                    | -              | 152.16          | C               | -             |
| 6                    | -              | 132.14          | C               | -             |
| 7                    | -              | 159.13          | -               | -             |
| 8                    | 6.89, s        | 91.86           | CH              | C-6, 7, 9, 10 |
| 9                    | -              | 152.26          | C               | -             |
| 10                   | -              | 106.08          | C               | -             |
| 1'                   | -              | 120.93          | C               | -             |
| 2'                   | 7.99, d, 7.5   | 130.67          | CH              | C-2, 6', 4'   |
| 3'                   | 6.97, d, 7.5   | 116.19          | CH              | C-1', 4', 5'  |
| 4'                   | -              | 160.89          | C               | -             |
| 5'                   | 6.97, d, 7.5   | 116.19          | CH              | C-1', 4', 3'  |
| 6'                   | 7.99, d, 7.5   | 130.67          | CH              | C-2, 2', 4'   |
| 5-OH                 | 12.63, brs     | -               | -               | -             |
| C-3 OCH <sub>3</sub> | 3.80, s        | 60.16           | CH <sub>3</sub> | C-3           |
| C-6 OCH <sub>3</sub> | 3.74, s        | 60.54           | CH <sub>3</sub> | C-6           |
| C-7 OCH <sub>3</sub> | 3.92, s        | 56.96           | CH <sub>3</sub> | C-7           |

Table S2: NMR spectral data of compound 2 (DMSO-*d*<sub>6</sub>, 500 MHz)

| Position | <sup>1</sup> H (J in Hz) | <sup>13</sup> C | DEPT            | HMBC                |
|----------|--------------------------|-----------------|-----------------|---------------------|
| 2        | -                        | 155.80          | C               |                     |
| 3        | -                        | 138.94          | C               |                     |
| 4        | -                        | 178.82          | C               |                     |
| 5        | -                        | 152.02          | C               |                     |
| 6        | -                        | 132.13          | C               |                     |
| 7        | -                        | 159.27          | C               |                     |
| 8        | 6.83, s                  | 91.85           | CH              | C-6, 7, 9, 10       |
| 9        | -                        | 152.27          | C               |                     |
| 10       | -                        | 106.13          | C               |                     |
| 1'       | -                        | 125.35          | C               |                     |
| 2'       | 7.27, s                  | 110.40          | CH              | C-2, 1', 3', 4', 6' |
| 3'       | -                        | 150.96          | C               |                     |
| 4'       | -                        | 139.47          | C               |                     |
| 5'       | -                        | 153.49          | C               |                     |
| 6'       | 7.19, s                  | 104.35          | CH              | C-2, 1', 2', 4', 5' |
| 5-OH     | 12.49, brs               | -               | -               | C-5, 6, 10          |
| 3'-OH    | 9.70                     | -               | -               |                     |
| 3-OMe    | 3.80, s                  | 60.37           | CH <sub>3</sub> | C-3                 |
| 6-OMe    | 3.72, s                  | 60.55           | CH <sub>3</sub> | C-6                 |
| 7-OMe    | 3.90, s                  | 56.93           | CH <sub>3</sub> | C-7                 |
| 5'-OMe   | 3.85, s                  | 56.45           | CH <sub>3</sub> | C-5'                |
| 4'-OMe   | 3.77, s                  | 60.55           | CH <sub>3</sub> | C-4'                |

Table S3: NMR spectral data of compound 3 (DMSO-*d*<sub>6</sub>, 500 MHz)

| Position   | <sup>1</sup> H (J in Hz) | <sup>13</sup> C | DEPT            | HMBC                |
|------------|--------------------------|-----------------|-----------------|---------------------|
| 2          | -                        | 155.98          | C               |                     |
| 3          | -                        | 139.04          | C               |                     |
| 4          | -                        | 178.84          | C               |                     |
| 5          | -                        | 152.04          | C               |                     |
| 6          | -                        | 132.13          | C               |                     |
| 7          | -                        | 159.30          | C               |                     |
| 8          | 6.93, s                  | 92.06           | CH              | C-6, 7, 9, 10       |
| 9          | -                        | 152.30          | C               |                     |
| 10         | -                        | 106.16          | C               |                     |
| 1'         | -                        | 125.49          | C               |                     |
| 2'         | 7.39, s                  | 106.39          | CH              | C-2, 1', 3', 4', 6' |
| 3'         | -                        | 153.25          | C               |                     |
| 4'         | -                        | 140.49          | C               |                     |
| 5'         | -                        | 153.25          | C               |                     |
| 6'         | 7.39, s                  | 106.39          | CH              | C-2, 1', 2', 4', 5' |
| 5-OH       | 12.51, brs               | -               | -               | C-5, 6, 10          |
| 3-OMe      | 3.84, s                  | 60.41           | CH <sub>3</sub> | C-3                 |
| 6-OMe      | 3.73, s                  | 60.54           | CH <sub>3</sub> | C-6                 |
| 7-OMe      | 3.92, s                  | 57.00           | CH <sub>3</sub> | C-7                 |
| 3', 5'-OMe | 3.88, s                  | 56.98           | CH <sub>3</sub> | C-5'                |
| 4'-OMe     | 3.77, s                  | 60.71           | CH <sub>3</sub> | C-4'                |
